# Supplementary material for: Low-Coverage Whole Genome Sequencing Diagnoses Endometrial Carcinoma from Tampon DNA of Uterine Bleeding Patients
Source: Research Square preprint supplement (doi:10.21203/rs.3.rs-644745/v1), 2021-07-12
Supplement: Supplementary file 1 [file 003eaddcd330deacd0450132.xlsx]

## Sheet: Sheet1
ID		Dx	FIGO		chr1p	chr1q	chr2p	chr2q	chr3p	chr3q	chr4p	chr4q	chr5p	chr5q	chr6p	chr6q	chr7p	chr7q	chr8p	chr8q	chr9p	chr9q	chr10p	chr10q	chr11p	chr11q	chr12p	chr12q	chr13q	chr14q	chr15q	chr16p	chr16q	chr17p	chr17q	chr18p	chr18q	chr19p	chr19q	chr20p	chr20q	chr21p	chr21q	chr22p	chr22q	chrXp
PK034-012		BE	#REF!	PGPN135-PK034-012_L2.bam.bin.cov.poly.corrected.bin.cov	0.995149	1.00177	0.996029	0.999068	0.995488	1.00067	0.995126	0.99593	0.991346	0.998167	0.999846	0.998857	0.994853	0.99445	0.991029	0.996309	0.988976	0.996007	0.997444	0.992667	0.994506	0.994961	0.996489	0.999489	0.995085	0.994326	0.990947	0.990698	0.992464	0.991675	0.996987	0.992058	0.995062	1.00773	0.998467	0.999666	1.00025	1.09575	0.998711	NA	0.988287	0.983055
PK034-019		BE	#REF!	PGPN135-PK034-019_L2.bam.bin.cov.poly.corrected.bin.cov	0.998841	1.00178	1.00098	0.999062	0.999176	0.99942	0.994499	0.998652	0.998942	0.998406	1.00447	1.001	0.998687	0.998052	0.998582	0.999833	0.992891	0.999747	1.00111	0.999495	0.998288	0.999853	0.999556	0.99854	0.998292	0.998015	1.00015	0.994494	0.998006	0.997894	0.999484	0.99931	0.998959	0.998557	0.999321	0.999687	1.00343	1.11739	1.00371	NA	1.00019	0.995667
PK034-023		BE	#REF!	PGPN139-PK034-023_L1.bam.bin.cov.poly.corrected.bin.cov	0.999057	1.00223	1.00115	1.00052	0.998506	1.00082	0.998731	0.998699	0.999283	1.0013	1.00055	1.00031	0.997997	0.997492	0.997141	1.00011	0.991124	1.0002	0.998102	0.996481	0.997364	0.998901	1.00255	1.00155	0.998168	0.997838	0.993539	0.995296	0.995206	0.993355	1.00059	0.990295	0.995601	1.00351	1.00762	1.00481	1.00271	1.15106	1.00223	NA	0.993008	0.996801
PK034-028		BE	#REF!	PGPN139-PK034-028_L1.bam.bin.cov.poly.corrected.bin.cov	0.994888	1.00042	0.997406	0.999849	0.997174	1.00106	0.996407	0.997648	0.99472	1.00086	1.0047	1.00105	0.99936	0.995863	0.993726	0.999574	0.991076	0.996104	0.998459	0.995538	0.994948	0.997342	0.999888	0.997573	0.996069	0.995116	0.994706	0.991008	0.992719	0.992066	0.998729	0.993217	0.997619	0.997219	0.996729	0.998756	0.99909	1.15603	1.00389	NA	0.991162	0.987051
PK034-029		BE	#REF!	PGPN139-PK034-029_L1.bam.bin.cov.poly.corrected.bin.cov	0.999633	1.00026	0.99942	0.999305	0.99913	1.00095	0.998626	0.999591	0.99872	0.999053	1.00313	0.999342	0.99789	0.99731	0.996013	0.999689	0.997259	0.999477	0.999167	1.00029	0.999676	1.00065	0.99878	0.999484	0.998165	0.999427	1.00102	0.998783	1.00034	1.00122	1.00181	0.999143	0.999238	1.00166	1.00007	1.0002	1.00196	1.07449	1.00167	NA	0.998263	0.99801
PK034-047		BE	#REF!	PGPN158-PK034-047_L1.bam.bin.cov.poly.corrected.bin.cov	0.998756	1.00002	0.999729	0.999846	1.00027	0.999839	0.999702	0.998591	0.998691	0.99963	1.00045	1.00022	0.9996	0.99801	1.00031	0.998993	0.993864	0.999152	0.999863	0.999703	0.997365	1.00034	0.996494	1.00041	0.998103	1.00086	1.00142	0.997041	0.999318	1.00053	1.00244	1.00098	0.998749	0.999119	1.00234	1.00095	1.00224	1.10759	1.00023	NA	0.999367	0.996665
PK034-003		BE	#REF!	PGPN85-PK034-003_L2.bam.bin.cov.poly.corrected.bin.cov	1.00168	0.99995	1.00029	0.999471	1.00114	0.998164	1.00005	0.998397	1.00212	1.00175	0.995794	0.99791	1.0017	0.999168	1.00089	0.999557	0.997231	1.00197	0.9977	1.00064	0.997857	1.00132	0.999181	0.999486	1.00054	1.00072	1.00119	1.0012	1.00167	0.998556	1.0019	0.998835	1.00076	1.00299	1.00164	1.00096	1.00339	1.29134	0.99541	NA	1.00277	1.00617
PK034-005		BE	#REF!	PGPN95-PK034-005_L4.bam.bin.cov.poly.corrected.bin.cov	0.999425	1.00325	0.999014	1.00005	0.998815	0.999805	0.997873	0.996708	0.999805	0.999763	1.00192	0.999559	1.00062	0.996749	0.99816	0.999687	0.993629	1.00039	0.997119	0.998574	0.997398	1.00124	0.998886	0.998488	0.996886	0.998037	0.999041	0.99392	0.994825	0.995867	1.00121	0.998006	0.996838	1.00076	1.00422	0.999914	1.00179	1.06837	1.0011	NA	0.996759	0.992597
PK034-004		BE	#REF!	PGPN96-PK034-004_L2.bam.bin.cov.poly.corrected.bin.cov	1.0009	1.00104	0.999811	0.999314	0.99982	1.00079	0.997992	1.00057	1.00214	1.00031	1.00022	0.999708	0.998431	0.999005	0.998875	0.999854	0.996961	1.00037	1.00148	0.998232	0.999261	1.00048	0.99807	0.999253	1.00114	0.999447	0.99948	1.00108	0.998544	0.997653	0.998315	0.999478	0.999003	0.998194	0.995819	1.00216	0.999089	1.13475	0.999985	NA	0.997961	1.00266
PK034-006		BE	#REF!	PGPN96-PK034-006_L2.bam.bin.cov.poly.corrected.bin.cov	0.997239	1.00119	0.998713	0.999991	0.998917	1.00039	0.998913	0.997301	0.995536	0.999291	1.00335	1.00039	0.999136	0.997843	0.996058	0.998836	0.987688	0.998563	0.997797	0.996217	0.996516	0.997895	0.996762	1.00041	0.996325	0.996137	0.993832	0.996428	0.995456	0.993013	1.00023	0.986243	0.996333	1.01136	1.0115	0.998973	1.00622	1.09244	1.00496	NA	0.994514	0.987268
PK034-007		BE	#REF!	PGPN96-PK034-007_L2.bam.bin.cov.poly.corrected.bin.cov	1.00053	1.00184	0.998573	1.00061	1.00038	1.00176	0.995977	1.00023	0.997356	1.00058	1.0069	0.997876	0.998573	0.998127	0.993881	0.999906	0.993774	1.00016	1.00066	0.997796	0.995367	0.997661	1.00081	1.00195	0.996571	0.999147	1.0024	0.994357	0.998682	0.995305	1.00056	1.00192	0.997746	0.997914	1.00125	0.996394	1.00289	1.07894	1.00586	NA	0.998821	0.996561
PK034-008		BE	#REF!	PGPN96-PK034-008_L2.bam.bin.cov.poly.corrected.bin.cov	1.00014	1.00159	0.996015	1.00049	0.997062	1.00158	0.996243	0.999298	0.993131	0.998636	1.00622	0.999347	0.999433	0.996368	0.994695	0.999357	0.992414	0.998593	1.00031	0.997629	0.997592	0.998453	0.999241	1.00006	0.994966	0.997875	1.00127	0.993458	1.00112	0.993409	1.00151	0.994876	0.997921	0.997978	0.997137	1.00244	0.999285	1.08167	1.00146	NA	0.997509	0.986336
PK034-013		EC	Ia	PGPN135-PK034-013_L2.bam.bin.cov.poly.corrected.bin.cov	0.998111	1.00012	0.999029	1.00061	0.998538	0.999429	0.998088	0.999655	0.998692	1.00161	0.998363	1.00076	1.00114	0.999071	0.998521	1.00109	0.996606	0.999809	0.998416	0.998494	0.996516	1.0008	1.00156	0.999202	0.999749	1.00208	0.999102	0.998809	1.00141	0.995645	1.00027	0.999143	0.999345	0.999264	0.995932	1.00165	1.00005	1.17662	0.998694	NA	0.994785	0.99516
PK034-014		BE	#REF!	PGPN135-PK034-014_L2.bam.bin.cov.poly.corrected.bin.cov	0.997819	1.00393	1.00024	0.999552	0.999632	1.00152	0.995949	0.999211	0.996319	1.00034	1.00291	0.998778	0.99652	0.998031	0.989951	0.999885	0.992171	1.00051	0.996054	0.996706	0.998596	0.997662	0.999221	0.999543	0.998387	0.996846	0.994367	0.991704	0.992392	0.99476	1.00191	0.993646	0.991119	1.0017	1.00626	0.99866	0.995911	1.13232	0.999757	NA	0.994687	0.988446
PK034-015		EC	Ia	PGPN135-PK034-015_L2.bam.bin.cov.poly.corrected.bin.cov	0.997677	1.0018	0.996827	0.998209	0.997733	0.999707	0.994977	0.996938	0.992703	0.999052	1.00347	0.997981	0.99458	0.995223	0.99469	0.999366	0.991293	0.997035	0.994482	0.994669	0.996679	0.999881	0.999841	0.999917	0.994677	0.997573	0.994462	0.987124	0.993491	0.991137	1.0003	0.993835	0.995731	0.997771	0.996157	0.998864	1.00055	1.13901	1.00079	NA	0.99447	0.988242
PK034-017		EC	Ia	PGPN135-PK034-017_L2.bam.bin.cov.poly.corrected.bin.cov	0.999737	0.999941	1.00098	1.00094	0.999997	1.00116	0.99821	0.999902	0.997285	0.999991	1.00381	1.00112	0.997176	0.998467	0.998553	0.998762	0.997866	0.999517	1.00064	0.997361	0.996256	0.999494	0.998712	1.00141	0.999506	0.997285	0.999553	0.995641	0.998184	0.999617	1.00161	0.996777	0.999673	1.00376	0.999332	1.00064	0.999883	1.09374	1.00266	NA	0.998782	0.994791
PK034-018		EC	IIIA	PGPN135-PK034-018_L2.bam.bin.cov.poly.corrected.bin.cov	0.995138	1.00199	0.996489	0.999747	0.995898	1.00253	0.994443	0.99707	0.993523	0.99957	1.00386	0.999968	0.995087	0.995278	0.991681	1.00157	0.991568	0.997014	0.998186	0.995032	0.996	0.998426	1.00088	0.999203	0.994398	0.997124	0.995604	0.988086	0.994685	0.984178	0.99739	0.993894	0.996164	0.992487	1.00035	0.997942	1.00041	1.06444	1.0024	NA	0.993568	0.987731
PK034-021		EC	Ia	PGPN135-PK034-021_L2.bam.bin.cov.poly.corrected.bin.cov	0.999371	1.00027	1.0035	1.00083	1.00011	1.00233	0.999686	0.999246	0.995456	1.00058	1.00246	1.00121	0.999582	0.996027	1.00065	1.00284	0.993765	0.999107	0.997776	1.00362	0.999609	1.00185	0.996887	0.998	0.996226	0.99998	1.00023	0.994289	0.999305	0.996648	1.00092	0.993233	0.999495	0.996265	0.996655	0.999067	0.99951	1.11097	0.999666	NA	0.994612	0.989521
PK034-025		EC	Ib	PGPN135-PK034-025_L2.bam.bin.cov.poly.corrected.bin.cov	0.999535	1.0029	0.998724	0.99738	0.997979	1.00044	0.997384	0.998633	0.99564	1.00003	1.00367	1.00136	0.996404	0.998321	0.990986	0.999934	0.992836	0.997019	0.995166	0.996214	0.995619	0.999533	1.00068	0.999545	0.996211	0.996572	0.994352	0.991249	0.993893	0.987582	0.998303	0.99141	0.995866	0.999513	1.00713	1.00033	0.997517	1.09836	0.999855	NA	0.992938	0.98558
PK034-026		EC	IB	PGPN135-PK034-026_L2.bam.bin.cov.poly.corrected.bin.cov	0.999801	1.00065	0.999649	1.00209	1.00037	1.00072	0.999658	0.999308	0.996011	0.99905	1.00435	1.00044	1.0023	0.997337	0.996779	1.00047	0.996466	1.00008	0.998597	0.998359	0.99873	1.00019	1.00024	0.998314	0.997925	0.999217	0.999641	0.996868	0.998445	1.0016	1.00068	0.998286	0.998196	1.00388	1.00301	1.0005	1.00157	1.13462	0.999395	NA	1.00015	0.996871
PK034-027		EC	Ia	PGPN135-PK034-027_L2.bam.bin.cov.poly.corrected.bin.cov	1.00079	1.001	1.00085	1.00002	1.00153	1.00219	0.998767	0.998541	0.999472	1.00008	1.00161	1.00018	0.999839	0.998968	0.999279	1.00098	0.994385	1.00022	0.99927	1.00015	0.996975	1.00101	0.998762	0.999759	0.999408	0.999097	0.998612	0.996186	0.99944	0.994981	0.998362	0.996493	1.00095	0.997954	1.00095	1.00105	1.00192	1.124	1.00107	NA	0.997316	0.994612
PK034-031		EC	Ia	PGPN135-PK034-031_L2.bam.bin.cov.poly.corrected.bin.cov	0.99929	1.00026	1.00172	0.998994	0.998398	1.00062	0.997991	0.998032	0.998682	0.999918	0.999401	1.00065	0.999117	0.998627	0.998773	0.999394	0.993684	0.999549	1.00222	1.00067	0.998071	0.999691	1.00208	0.999216	0.998059	0.997968	1.00054	1.00072	1.00129	1.00312	0.998611	1.00142	1.00097	0.997503	0.997013	1.00089	1.0029	1.14545	1.00159	NA	0.998144	0.994125
PK034-033		EC	IB	PGPN135-PK034-033_L2.bam.bin.cov.poly.corrected.bin.cov	1.00003	0.999506	1.00056	0.99931	0.998028	0.99841	0.998275	0.999646	0.996968	0.998763	1.00203	0.99982	1.00446	1.00134	0.998244	0.998296	0.992492	1.00049	1.00027	0.99862	0.997297	0.999784	1.00327	1.00122	1.00004	0.998185	0.998605	0.996903	0.99764	0.999597	1.00081	0.997206	0.998094	0.999567	1.00394	1.0005	1.00347	1.12189	1.00165	NA	0.99933	0.9928
PK034-035		EC	IB	PGPN140-PK034-035_L2.bam.bin.cov.poly.corrected.bin.cov	0.998951	1.00167	0.999562	0.999759	0.996787	1.00154	1.00047	0.999748	0.994578	1.00043	1.00776	1.00214	0.997976	0.994424	0.987353	0.998055	0.988129	0.997179	0.992196	0.996265	0.996565	0.997169	0.99913	1.00059	1.0003	0.99705	0.993933	0.983916	0.994533	0.985081	1.00451	0.984024	0.994611	1.01012	1.00705	0.995837	0.994627	1.15098	1.00078	NA	0.995866	0.984642
PK034-038		EC	Ia	PGPN140-PK034-038_L2.bam.bin.cov.poly.corrected.bin.cov	0.997211	1.00333	1.00142	0.999775	0.999928	1.00148	0.997789	1.00174	0.996686	0.998912	1.00505	0.999823	1.00027	0.997004	0.990918	1.00157	0.992098	0.997929	0.995214	0.998002	0.996729	0.999917	0.996741	1.00197	0.995334	0.997621	0.995395	0.986038	0.993029	0.992889	0.997183	0.993437	0.997369	1.00254	1.00288	0.998779	0.998581	1.09005	1.00319	NA	0.990955	0.990974
PK034-039		EC	Ia	PGPN140-PK034-039_L2.bam.bin.cov.poly.corrected.bin.cov	0.999287	1.00072	0.999494	1.00096	0.999073	1.00027	0.999956	0.999172	0.999618	1.00118	1.0027	1.00093	1.00053	0.99811	0.998707	1.00243	0.993883	0.999205	1.00084	0.998875	0.994618	0.99939	0.999809	1.00001	0.997559	0.999372	0.998443	0.993911	0.997113	0.997029	0.998775	0.999018	0.997699	1.00001	0.999169	1.00127	0.999209	1.15315	1.00468	NA	0.992629	0.993075
PK034-042		EC	IB	PGPN140-PK034-042_L2.bam.bin.cov.poly.corrected.bin.cov	0.998836	1.00224	1.00061	1.00074	1.00011	1.00198	0.997102	0.998887	0.996509	1.0012	1.00197	1.00118	0.998629	0.997559	0.997417	1.00226	0.996135	0.997484	0.998375	0.99806	0.997883	1.00238	1.00039	1.00044	0.99672	0.999123	0.997828	0.995964	1.00108	0.992572	0.999134	0.995945	0.99864	0.995349	0.999402	0.999115	0.999855	1.17079	1.00031	NA	0.995572	0.991106
PK034-043		EC	IIIC1	PGPN140-PK034-043_L2.bam.bin.cov.poly.corrected.bin.cov	0.99548	1.00643	0.998721	0.999339	0.998111	1.00094	0.999129	0.998135	0.995915	0.999155	1.00113	0.9998	0.996545	0.99551	0.996864	1.00279	0.987797	0.996863	0.995692	0.996004	0.994561	0.997683	0.996572	1.00013	0.996193	0.997415	0.987463	0.993839	0.992334	0.989696	1.00462	0.992443	0.992747	1.01676	1.01948	0.99643	1.00362	1.11946	1.00063	NA	0.992787	0.984908
PK034-041		EC	IIIC1	PGPN158-PK034-041_L1.bam.bin.cov.poly.corrected.bin.cov	1.00029	0.999452	1.00038	0.999546	0.999137	1.00234	0.998126	0.999018	0.996848	0.999585	1.001	1.00108	0.998397	0.998129	0.9995	0.999039	0.996358	0.998954	0.999487	0.999916	0.998375	1.00031	1.00086	0.99892	0.999266	0.998277	1.00233	0.997427	1.0001	0.99996	1.00005	0.998556	0.999422	0.996592	1.0013	0.998029	1.0033	1.0983	0.999421	NA	0.998986	0.99633
PK034-048		EC	Ia	PGPN158-PK034-048_L1.bam.bin.cov.poly.corrected.bin.cov	0.998566	1.00295	0.999651	0.999393	0.997966	1.00094	0.998349	0.998289	0.995802	0.997646	1.00449	0.998303	0.999009	0.995653	0.996035	1.00007	0.995126	1.00002	1.00004	0.995265	0.996644	0.998799	0.99876	1.00066	0.997556	0.997491	0.998187	0.996247	0.996524	0.999346	1.0033	0.994071	0.998194	1.00037	1.00602	0.999133	1.00315	1.06174	1.00496	NA	0.996118	0.990632
PK034-049		EC	Ia	PGPN158-PK034-049_L1.bam.bin.cov.poly.corrected.bin.cov	0.999813	0.999306	1.00005	0.999424	0.997936	1.00056	0.999165	0.999714	0.998741	0.999073	1.0036	0.999002	0.999704	0.996682	0.995807	0.99931	0.995381	1.0011	0.999339	0.997886	0.999485	0.998382	1.00093	1.00124	0.999323	0.999212	0.999528	0.998526	0.995993	0.999553	1.00171	0.996361	0.998685	1.00022	1.00065	0.998342	1.00218	1.10508	1.00281	NA	1.00049	0.99661
PK034-051		EC	IB	PGPN163-PK034-051_L1.bam.bin.cov.poly.corrected.bin.cov	0.998623	1.00177	0.998455	0.998969	0.998827	0.999947	0.997989	0.999084	0.998136	1.00105	1.00386	1.00012	1.00051	0.997366	0.99857	1.00039	0.9942	0.999899	1.00037	0.996272	0.998008	0.997912	0.998583	0.998677	0.998681	0.998947	0.998296	0.996051	0.997812	0.999789	1.00093	0.99595	0.999802	1.00018	1.00567	0.999704	0.998856	1.11459	1.00436	NA	0.996356	0.9928
PK034-055		EC	Ia	PGPN163-PK034-055_L1.bam.bin.cov.poly.corrected.bin.cov	1.00028	1.00054	1.00043	1.00007	0.999652	0.999428	1.00074	0.998964	0.998568	1.00011	1.00072	0.999669	0.997635	0.998587	1.00138	1.00115	0.996402	0.997949	0.999864	1.00054	0.99699	1.00011	0.999982	0.99958	0.998815	1.00031	0.998997	0.999666	1.00017	0.994769	1.00096	0.999438	1.00055	0.997667	0.999004	1.00037	0.999879	1.1357	1.00172	NA	0.997233	0.995362
PK034-059		EC	Ia	PGPN175-PK034-059_L2.bam.bin.cov.poly.corrected.bin.cov	0.99939	1.00362	0.99868	0.999701	1.00078	1.00161	0.998543	0.998298	0.996512	0.999808	1.00518	0.99919	0.999098	0.997289	0.997119	0.997595	0.994338	0.999247	0.995823	0.998188	0.997397	1.00104	0.999935	1.00173	0.996477	1.00043	0.998584	0.996162	0.997426	1.00167	1.00448	0.99604	0.996951	1.01715	1.01794	1.00024	1.00247	1.08424	1.00018	NA	0.998289	0.993813
PK034-067		EC	Ia	PGPN175-PK034-067_L2.bam.bin.cov.poly.corrected.bin.cov	1.00095	0.999672	1.0018	1.00123	0.999745	1.00044	0.99905	0.998684	0.999676	0.999841	1.00059	1.00114	0.999881	1.00162	1.00062	1.00229	0.997135	0.998455	1.00147	1.00204	0.998584	0.998216	1.00303	1.00193	0.998481	0.997987	0.99888	0.994652	0.997933	0.995977	0.999948	1.00187	0.99904	0.995038	0.996749	1.00026	1.00009	1.13481	1.00149	NA	0.99691	0.994884
PK034-072		EC	Ia	PGPN176-PK034-072_L1.bam.bin.cov.poly.corrected.bin.cov	0.99916	1.00241	0.999482	1.00087	1.00066	1.00064	1.00151	1.00034	0.998616	1.00052	1.00332	1.00054	1.00116	0.998244	0.996471	1.00181	0.992836	0.998396	0.997893	0.999369	0.996878	0.999473	1.00167	0.999361	0.998591	1.00064	0.997126	0.993133	0.994235	0.995844	0.998269	0.995028	0.998488	0.998114	0.998133	1.00266	1.00369	1.15205	0.999409	NA	0.997007	0.996724
PK034-002		EC	IB	PGPN85-PK034-002_L2.bam.bin.cov.poly.corrected.bin.cov	1.00024	0.995546	0.997732	0.994377	0.990479	0.996968	0.992511	0.994195	0.994176	0.995288	0.991713	0.993116	0.997585	0.993349	0.99016	0.994829	0.991222	1.00219	1.00039	1.00722	0.999908	1.00358	0.999841	0.994796	0.993134	1.00371	1.00524	0.984831	0.990529	1.01204	1.00858	1.01829	0.998341	1.00144	0.99998	0.996217	0.997318	1.17358	0.990645	NA	1.01892	1.00296
PK034-009		EC	Ia	PGPN96-PK034-009_L2.bam.bin.cov.poly.corrected.bin.cov	0.996764	0.999869	1.0053	1.00661	0.9988	1.00186	0.996658	1.00434	0.996068	0.998539	0.999921	0.998917	0.997847	0.994415	1.01144	1.01924	0.98921	0.99648	0.995619	1.00524	0.994692	0.997586	0.997523	0.995279	1.00083	0.996273	0.996533	0.994192	0.991349	0.995697	0.998142	1.01072	1.00004	0.989628	0.991869	0.997031	1.00175	1.11137	0.993108	NA	0.99712	0.980312
PK034-034		USC	II	PGPN135-PK034-034_L2.bam.bin.cov.poly.corrected.bin.cov	1.00054	0.998716	1.00236	1.00474	1.00002	1.01172	0.999157	0.994945	1.00316	0.99662	1.003	0.999893	0.996057	0.992509	0.993047	1.0089	0.994992	0.99632	1.00579	0.99677	0.993083	0.996836	1.00027	0.998687	1.00052	1.00022	0.991931	0.991596	0.991636	0.98806	1.00005	0.994435	0.991555	1.00285	1.00208	0.997103	1.00607	1.14589	1.00154	NA	0.997096	0.987051
PK034-024		USC	III	PGPN139-PK034-024_L1.bam.bin.cov.poly.corrected.bin.cov	0.999861	1.00146	0.999498	1.00109	0.999561	1.0022	0.998836	0.999383	0.995902	0.9998	1.00295	0.999674	1.00047	0.997008	0.997638	1.00086	0.992352	1.00005	0.998516	1.00033	0.997876	1.00217	0.997611	0.999436	0.996625	1.00061	1.00141	0.993688	0.9986	0.99424	0.998085	1.00145	1.00007	0.990672	0.995803	1.00129	0.998113	1.06497	1.00292	NA	0.998682	0.989369
PK034-050		USC	Ib	PGPN163-PK034-050_L1.bam.bin.cov.poly.corrected.bin.cov	1.00076	1.00435	0.998644	0.999284	0.994865	0.998423	0.995818	0.995598	0.999092	1.00023	1.00765	1.00033	0.995974	1.00062	0.991988	1.02075	0.98811	0.996214	1.00052	0.99907	0.996467	0.997455	0.999546	0.997745	0.9943	0.999183	0.992986	0.990917	0.99412	0.992484	0.999902	0.99337	0.998856	1.01219	1.01895	1.00251	1.01098	1.10866	1.00874	NA	0.994526	0.979791
PK034-010		USC	Ia	PGPN98-PK034-010_L3.bam.bin.cov.poly.corrected.bin.cov	0.999421	1.00049	0.999433	1.00032	1.00096	1.00025	0.998733	1.00045	0.998523	0.999288	1.0028	0.999369	0.997578	0.997725	0.997467	1.00159	0.996574	0.999103	1.00005	1.00165	1.00117	1.00086	0.999312	0.998798	0.999116	1.00058	1.00092	0.997283	1.00067	0.993159	0.996323	1.00027	1.003	0.991462	0.996233	1.00138	0.999932	1.11424	0.999621	NA	0.998346	0.997171
PG1249		EC	Ia	PGPN81-PG1249_L3.bam.bin.cov.poly.corrected.bin.cov	1.00113	1.00011	1.00079	0.99985	1.00103	1.00039	1.00001	0.998448	0.999416	0.999855	1.00072	0.999435	0.999697	0.997656	0.999862	1.00143	0.997162	1.00122	0.996866	1.00013	0.998671	1.00066	0.997259	0.998264	1.00102	1.00075	1.00029	0.999074	1.00175	0.996241	1.00012	1.00305	0.998786	0.993304	0.997499	1.00202	1.00205	1.10624	0.99806	NA	1.00297	0.99919
PK034-058	2.20063	BE	0	PGPN163-PK034-058_L1.bam.bin.cov.poly.corrected.bin.cov	0.16711	0.151248	0.800888	0.934647	0.918976	-0.536816	0.641084	-0.0238235	0.73667	0.889163	-0.845744	-0.0484344	0.278314	0.210724	0.467334	2.59211	2.20063	0.0751038	0.232808	1.60954	0.0890777	0.729447	1.79585	0.281798	0.716133	0.856825	0.271315	1.3986	0.869903	0.199841	-0.459566	0.714967	1.21626	-1.19077	-1.65246	1.37701	0.224324	0.414641	-0.179652	#VALUE!	0.254986	0.490628
				mean	0.998773	1.00148	0.999029	0.999779	0.998885	1.00052	0.997392	0.998525	0.997547	0.999853	1.00234	0.999566	0.998677	0.997421	0.996101	0.999353	0.993004	0.999326	0.998866	0.99769	0.997287	0.998982	0.998918	0.999711	0.997592	0.997984	0.997951	0.995343	0.99698	0.995792	1.00043	0.996001	0.997303	1.00144	1.00172	1.00027	1.0014	1.1217	1.00146	#DIV/0!	0.996408	0.993637
				std	0.00205459	0.00120442	0.00167466	0.000538151	0.0015475	0.00100276	0.00179158	0.00134313	0.00324347	0.00112212	0.00300672	0.00103153	0.00171871	0.00129713	0.00336532	0.000984038	0.00297407	0.00170304	0.00169472	0.00220436	0.00158771	0.00187138	0.00172146	0.00120142	0.00186976	0.00199374	0.00387308	0.00346403	0.0033164	0.0031474	0.00163868	0.00467911	0.00243891	0.00419996	0.00463537	0.00208577	0.00262983	0.0587028	0.00279983	#DIV/0!	0.00395998	0.00687225
ID	Z score	Dx	FIGO	Seq	chr1p	chr1q	chr2p	chr2q	chr3p	chr3q	chr4p	chr4q	chr5p	chr5q	chr6p	chr6q	chr7p	chr7q	chr8p	chr8q	chr9p	chr9q	chr10p	chr10q	chr11p	chr11q	chr12p	chr12q	chr13q	chr14q	chr15q	chr16p	chr16q	chr17p	chr17q	chr18p	chr18q	chr19p	chr19q	chr20p	chr20q	chr21p	chr21q	chr22p	chr22q	chrXp
PK034-012	2.29046	BE	#REF!	PGPN135-PK034-012_L2.bam.bin.cov.poly.corrected.bin.cov	-1.76388	0.236233	-1.79114	-1.32039	-2.1951	0.151574	-1.26462	-1.93153	-1.91158	-1.50282	-0.830808	-0.686941	-2.2251	-2.29046	-1.50696	-3.09354	-1.35441	-1.9488	-0.838987	-2.27871	-1.75191	-2.14858	-1.41114	-0.184641	-1.3405	-1.83496	-1.8085	-1.34096	-1.36181	-1.30821	-2.10385	-0.842611	-0.919106	1.49771	-0.702078	-0.291377	-0.439987	-0.442059	-0.981504	#VALUE!	-2.05076	-1.53992
PK034-019	1.61466	BE	#REF!	PGPN135-PK034-019_L2.bam.bin.cov.poly.corrected.bin.cov	0.0326516	0.249817	1.16518	-1.33222	0.187987	-1.09733	-1.61466	0.0944531	0.430211	-1.28967	0.706844	1.3912	0.0055956	0.486434	0.737413	0.488375	-0.0380871	0.247447	1.32367	0.81913	0.630183	0.465401	0.370619	-0.974721	0.374248	0.0157314	0.567651	-0.245376	0.3094	0.66792	-0.580087	0.707089	0.678781	-0.686021	-0.517716	-0.28146	0.769906	-0.0734571	0.803807	#VALUE!	0.955166	0.295264
PK034-023	2.11047	BE	#REF!	PGPN139-PK034-023_L1.bam.bin.cov.poly.corrected.bin.cov	0.137915	0.621898	1.26777	1.37586	-0.244712	0.29802	0.747616	0.129593	0.535218	1.28793	-0.596452	0.724595	-0.39544	0.0553607	0.309038	0.766917	-0.63227	0.512201	-0.450777	-0.548387	0.0482216	-0.0430456	2.11047	1.53318	0.308353	-0.0733059	-1.13911	-0.0135937	-0.534808	-0.774298	0.0919729	-1.21952	-0.697973	0.493317	1.27296	2.17377	0.496703	0.500067	0.276616	#VALUE!	-0.858512	0.460361
PK034-028	1.89193	BE	#REF!	PGPN139-PK034-028_L1.bam.bin.cov.poly.corrected.bin.cov	-1.89089	-0.886041	-0.968948	0.130434	-1.1054	0.539604	-0.549339	-0.653085	-0.871575	0.895858	0.785056	1.43808	0.397522	-1.20074	-0.705705	0.224991	-0.648345	-1.89193	-0.240316	-0.975902	-1.47305	-0.876418	0.563776	-1.77884	-0.814651	-1.43861	-0.837961	-1.25171	-1.28478	-1.18387	-1.04099	-0.594879	0.129381	-1.00461	-1.07702	-0.72779	-0.879405	0.584745	0.86744	#VALUE!	-1.32477	-0.958456
PK034-029	1.72362	BE	#REF!	PGPN139-PK034-029_L1.bam.bin.cov.poly.corrected.bin.cov	0.418355	-1.01673	0.233286	-0.880673	0.158055	0.431801	0.688942	0.793867	0.361838	-0.71251	0.262285	-0.216683	-0.457614	-0.0849688	-0.0259636	0.341385	1.43057	0.0888847	0.177516	1.17989	1.50456	0.89334	-0.0799694	-0.188816	0.306322	0.723835	0.793497	0.993009	1.01347	1.72362	0.836492	0.671524	0.793163	0.0531154	-0.357154	-0.0339929	0.211098	-0.804271	0.0747616	#VALUE!	0.46848	0.636296
PK034-047	1.50498	BE	#REF!	PGPN158-PK034-047_L1.bam.bin.cov.poly.corrected.bin.cov	-0.0083068	-1.21213	0.418203	0.124829	0.89264	-0.679661	1.28969	0.0494665	0.352932	-0.198811	-0.629435	0.633626	0.536842	0.454388	1.25155	-0.366119	0.288918	-0.101952	0.588372	0.913345	0.0488865	0.726704	-1.4078	0.584179	0.273424	1.44201	0.896593	0.490093	0.704909	1.50498	1.22242	1.06507	0.592586	-0.552243	0.132845	0.321884	0.316401	-0.240426	-0.438238	#VALUE!	0.74721	0.440528
PK034-003	2.34982	BE	#REF!	PGPN85-PK034-003_L2.bam.bin.cov.poly.corrected.bin.cov	1.41464	-1.27216	0.752378	-0.572522	1.45509	-2.34982	1.48544	-0.0952931	1.41028	1.69023	-2.17865	-1.60505	1.75755	1.34743	1.42172	0.207551	1.42112	1.55201	-0.687852	1.33679	0.359131	1.2485	0.15289	-0.186571	1.57545	1.37418	0.835314	1.6912	1.41408	0.878002	0.891628	0.60568	1.41566	0.370456	-0.0180857	0.330175	0.756565	2.88978	-2.1605	#VALUE!	1.6076	1.82405
PK034-005	1.46657	BE	#REF!	PGPN95-PK034-005_L4.bam.bin.cov.poly.corrected.bin.cov	0.317038	1.46657	-0.00903539	0.502373	-0.0454635	-0.713703	0.268423	-1.35237	0.696174	-0.0803313	-0.141212	-0.00594946	1.13295	-0.518082	0.611944	0.339603	0.209835	0.622771	-1.03069	0.401333	0.0696584	1.20682	-0.0185072	-1.01785	-0.377616	0.0263484	0.281296	-0.410954	-0.649802	0.0236448	0.472409	0.428565	-0.190691	-0.16058	0.539485	-0.172593	0.145526	-0.908465	-0.129436	#VALUE!	0.088577	-0.151446
PK034-004	1.89746	BE	#REF!	PGPN96-PK034-004_L2.bam.bin.cov.poly.corrected.bin.cov	1.03637	-0.3664	0.46691	-0.862955	0.604225	0.267096	0.335258	1.5236	1.41479	0.409786	-0.707161	0.138556	-0.143194	1.22145	0.824485	0.509419	1.33034	0.613635	1.54144	0.246187	1.24319	0.801724	-0.492634	-0.381198	1.89746	0.733682	0.394751	1.65522	0.471563	0.591212	-1.29367	0.743111	0.696774	-0.772629	-1.27318	0.902563	-0.8799	0.222191	-0.526484	#VALUE!	0.392243	1.31245
PK034-006	1.7877	BE	#REF!	PGPN96-PK034-006_L2.bam.bin.cov.poly.corrected.bin.cov	-0.746704	-0.246371	-0.188429	0.394118	0.0206037	-0.131383	0.849194	-0.91095	-0.619847	-0.500849	0.335639	0.802415	0.266969	0.32548	-0.0127251	-0.525171	-1.7877	-0.448044	-0.630676	-0.668002	-0.485887	-0.580741	-1.25207	0.586194	-0.677789	-0.926315	-1.06358	0.313092	-0.459517	-0.882978	-0.126153	-2.0854	-0.397828	2.36197	2.11017	-0.623709	1.83034	-0.498401	1.24907	#VALUE!	-0.478137	-0.926837
PK034-007	1.86058	BE	#REF!	PGPN96-PK034-007_L2.bam.bin.cov.poly.corrected.bin.cov	0.852994	0.297494	-0.271939	1.54914	0.967922	1.23244	-0.78956	1.26622	-0.0586183	0.650676	1.51485	-1.63823	-0.0606578	0.544697	-0.659582	0.562512	0.258576	0.489837	1.05777	0.0480529	-1.20955	-0.706049	1.10031	1.86058	-0.545735	0.583092	1.14828	-0.284916	0.513261	-0.154743	0.0758111	1.26522	0.181435	-0.839248	-0.101026	-1.86009	0.566559	-0.728516	1.57245	#VALUE!	0.609359	0.425472
PK034-008	1.79969	BE	#REF!	PGPN96-PK034-008_L2.bam.bin.cov.poly.corrected.bin.cov	0.664347	0.0916818	-1.79969	1.31282	-1.17822	1.05669	-0.641174	0.575395	-1.36128	-1.08415	1.28968	-0.212022	0.439762	-0.811567	-0.417797	0.00372601	-0.198412	-0.430289	0.850167	-0.0275343	0.191862	-0.282343	0.187707	0.288053	-1.40443	-0.0547597	0.857242	-0.544378	1.2475	-0.757212	0.654032	-0.240453	0.25337	-0.823852	-0.988986	1.03665	-0.805456	-0.68203	-0.000139716	#VALUE!	0.278081	-1.06238
PK034-013	3.53919	EC	Ia	PGPN135-PK034-013_L2.bam.bin.cov.poly.corrected.bin.cov	-0.322273	-1.1336	-0.000213141	1.53653	-0.22428	-1.08814	0.388725	0.841767	0.353289	1.5679	-1.32421	1.15964	1.43058	1.27266	0.71911	1.76959	1.21109	0.283705	-0.265398	0.364867	-0.485631	0.972881	1.53362	-0.423506	1.15386	2.05295	0.297045	1.00038	1.33633	-0.0467625	-0.103611	0.671499	0.837089	-0.517755	-1.24892	0.660022	-0.512849	0.935581	-0.987633	#VALUE!	-0.409908	0.221548
PK034-014	2.03614	BE	#REF!	PGPN135-PK034-014_L2.bam.bin.cov.poly.corrected.bin.cov	-0.464529	2.03614	0.72545	-0.420811	0.482375	0.994678	-0.805203	0.510628	-0.378553	0.434666	0.189365	-0.763597	-1.25518	0.470584	-1.82741	0.54035	-0.280136	0.694231	-1.65965	-0.446185	0.8247	-0.705312	0.176349	-0.139548	0.425464	-0.570922	-0.92548	-1.05073	-1.38347	-0.328064	0.89999	-0.503398	-2.53555	0.0626181	0.979785	-0.774036	-2.08835	0.180838	-0.607833	#VALUE!	-0.434526	-0.755384
PK034-015	2.91652	EC	Ia	PGPN135-PK034-015_L2.bam.bin.cov.poly.corrected.bin.cov	-0.533607	0.265932	-1.31499	-2.91652	-0.744754	-0.811367	-1.3475	-1.18141	-1.4933	-0.714126	0.373407	-1.53645	-2.384	-1.69384	-0.419068	0.0128173	-0.575546	-1.34507	-2.58701	-1.37048	-0.382801	0.480677	0.53654	0.171698	-1.55908	-0.206038	-0.900963	-2.37279	-1.05196	-1.47904	-0.081909	-0.462978	-0.644807	-0.873348	-1.20038	-0.676193	-0.32349	0.294894	-0.238693	#VALUE!	-0.489388	-0.785086
PK034-017	2.15502	EC	Ia	PGPN135-PK034-017_L2.bam.bin.cov.poly.corrected.bin.cov	0.469113	-1.2798	1.16249	2.15502	0.718758	0.634936	0.45707	1.0256	-0.0806654	0.123249	0.487189	1.50538	-0.873247	0.806558	0.728584	-0.600342	1.63449	0.112344	1.04831	-0.149118	-0.649108	0.273504	-0.119491	1.41352	1.02395	-0.350396	0.413545	0.0858199	0.362919	1.21507	0.719399	0.165925	0.971836	0.552912	-0.515496	0.177729	-0.578008	-0.476268	0.428248	#VALUE!	0.599433	0.167902
PK034-018	4.50286	EC	IIIA	PGPN135-PK034-018_L2.bam.bin.cov.poly.corrected.bin.cov	-1.76928	0.422701	-1.51694	-0.0590897	-1.93047	2.00259	-1.64567	-1.08338	-1.24054	-0.251947	0.504532	0.390113	-2.08862	-1.65204	-1.31319	2.25143	-0.48301	-1.35731	-0.401177	-1.20557	-0.810364	-0.297086	1.14047	-0.422469	-1.70798	-0.431132	-0.605977	-2.09507	-0.692051	-3.6902	-1.85789	-0.450363	-0.46717	-2.13144	-0.295783	-1.11804	-0.379149	-0.975423	0.337804	#VALUE!	-0.717021	-0.859491
PK034-021	7.09607	EC	Ia	PGPN135-PK034-021_L2.bam.bin.cov.poly.corrected.bin.cov	0.290738	-1.00941	2.67016	1.96113	0.792675	1.80329	1.28065	0.536948	-0.644653	0.645466	0.0373345	1.5895	0.526591	-1.07413	1.35301	3.54803	0.255821	-0.128535	-0.643593	2.68921	1.46214	1.53197	-1.17952	-1.42384	-0.730578	1.00121	0.589009	-0.304332	0.701146	0.271948	0.294724	-0.591462	0.898517	-1.23189	-1.09303	-0.578992	-0.719666	-0.18284	-0.640245	#VALUE!	-0.453428	-0.599044
PK034-025	4.45702	EC	Ib	PGPN135-PK034-025_L2.bam.bin.cov.poly.corrected.bin.cov	0.370468	1.17302	-0.182349	-4.45702	-0.585598	-0.0815048	-0.00450543	0.0806635	-0.58771	0.155908	0.440335	1.74397	-1.32228	0.694198	-1.51992	0.590819	-0.0568044	-1.35462	-2.18353	-0.669438	-1.05054	0.294381	1.02529	-0.137775	-0.738481	-0.708114	-0.929338	-1.18197	-0.930815	-2.60866	-1.30106	-0.981265	-0.589367	-0.458554	1.16643	0.0280776	-1.47754	-0.397564	-0.57296	#VALUE!	-0.87621	-1.17252
PK034-026	4.29705	EC	IB	PGPN135-PK034-026_L2.bam.bin.cov.poly.corrected.bin.cov	0.500323	-0.694955	0.370166	4.29705	0.958705	0.199716	1.26475	0.582961	-0.473317	-0.715365	0.666886	0.848714	2.10543	-0.0645962	0.201572	1.13755	1.16396	0.445476	-0.15868	0.303467	0.909021	0.64351	0.770712	-1.16281	0.177974	0.618291	0.436275	0.440071	0.441771	1.84637	0.150572	0.488264	0.366214	0.582214	0.278101	0.107482	0.0632438	0.220034	-0.737169	#VALUE!	0.946007	0.470561
PK034-027	3.31187	EC	Ia	PGPN135-PK034-027_L2.bam.bin.cov.poly.corrected.bin.cov	0.97965	-0.3999	1.08978	0.453999	1.71208	1.66325	0.767562	0.012197	0.593594	0.205665	-0.243643	0.594399	0.675966	1.19277	0.944432	1.65593	0.464296	0.527126	0.238074	1.11499	-0.196364	1.08472	-0.0902976	0.0404366	0.971151	0.558101	0.170777	0.243089	0.741668	-0.257721	-1.26474	0.105132	1.49637	-0.829643	-0.165727	0.370166	0.198164	0.0390674	-0.140632	#VALUE!	0.229311	0.141759
PK034-031	2.32714	EC	Ia	PGPN135-PK034-031_L2.bam.bin.cov.poly.corrected.bin.cov	0.251539	-1.01875	1.60513	-1.45818	-0.314871	0.102286	0.334359	-0.366998	0.350041	0.0580898	-0.978798	1.04913	0.255934	0.930085	0.79396	0.0413698	0.228613	0.131317	1.98121	1.35138	0.493562	0.379063	1.8369	-0.411736	0.249902	-0.00794476	0.669426	1.55247	1.29966	2.32714	-1.11291	1.15716	1.50371	-0.937032	-1.01575	0.294852	0.567805	0.404512	0.0473305	#VALUE!	0.438556	0.0708972
PK034-033	3.3642	EC	IB	PGPN135-PK034-033_L2.bam.bin.cov.poly.corrected.bin.cov	0.61346	-1.64094	0.913644	-0.870702	-0.553948	-2.10479	0.492847	0.834696	-0.178532	-0.970976	-0.104781	0.246373	3.3642	3.0234	0.636806	-1.07408	-0.172192	0.68616	0.828779	0.422172	0.00619983	0.428433	2.5307	1.25906	1.3088	0.100758	0.168866	0.450191	0.198994	1.2089	0.230223	0.257586	0.324051	-0.445558	0.47823	0.110354	0.787847	0.00318898	0.0684596	#VALUE!	0.737828	-0.121838
PK034-035	3.93566	EC	IB	PGPN140-PK034-035_L2.bam.bin.cov.poly.corrected.bin.cov	0.0866474	0.157004	0.318628	-0.0375568	-1.356	1.01536	1.71686	0.910905	-0.915232	0.513347	1.8006	2.49498	-0.408078	-2.3099	-2.59937	-1.31869	-1.63921	-1.2606	-3.93566	-0.646097	-0.455076	-0.968891	0.123275	0.731936	1.44817	-0.468668	-1.03735	-3.29885	-0.73788	-3.40335	2.48511	-2.55973	-1.10386	2.06619	1.14928	-2.12748	-2.57662	0.498685	-0.242561	#VALUE!	-0.136713	-1.30895
PK034-038	4.51004	EC	Ia	PGPN140-PK034-038_L2.bam.bin.cov.poly.corrected.bin.cov	-0.760215	1.52971	1.42818	-0.00621727	0.674139	0.952647	0.222003	2.39229	-0.26537	-0.838743	0.89893	0.249729	0.928706	-0.321225	-1.54017	2.25502	-0.304789	-0.820196	-2.15524	0.141701	-0.351285	0.499694	-1.26445	1.87758	-1.20737	-0.182175	-0.659963	-2.68619	-1.19125	-0.922569	-1.98455	-0.547933	0.0270364	0.262693	0.248951	-0.716888	-1.07299	-0.539227	0.618341	#VALUE!	-1.3769	-0.387619
PK034-039	6.25542	EC	Ia	PGPN140-PK034-039_L2.bam.bin.cov.poly.corrected.bin.cov	0.249902	-0.634222	0.277988	2.19152	0.121679	-0.250595	1.43126	0.482061	0.63857	1.18684	0.118876	1.32073	1.07652	0.531415	0.774578	3.12771	0.295324	-0.0706013	1.16447	0.53766	-1.68101	0.218336	0.517853	0.25333	-0.0178311	0.69612	0.126974	-0.413462	0.0400774	0.39299	-1.01317	0.644711	0.162432	-0.33915	-0.550544	0.478202	-0.834155	0.535645	1.15087	#VALUE!	-0.95417	-0.081786
PK034-042	5.91027	EC	IB	PGPN140-PK034-042_L2.bam.bin.cov.poly.corrected.bin.cov	0.0303799	0.628095	0.942372	1.77816	0.788955	1.45438	-0.161863	0.269559	-0.320014	1.19939	-0.125005	1.56484	-0.0276407	0.106412	0.391137	2.95514	1.05269	-1.08136	-0.290104	0.167902	0.375568	1.81386	0.853032	0.610916	-0.466561	0.571459	-0.0317378	0.179134	1.2369	-1.02316	-0.79356	-0.0119542	0.548065	-1.45	-0.500284	-0.555851	-0.588667	0.836171	-0.410344	#VALUE!	-0.210999	-0.368341
PK034-043	6.97655	EC	IIIC1	PGPN140-PK034-043_L2.bam.bin.cov.poly.corrected.bin.cov	-1.60286	4.11042	-0.183728	-0.81672	-0.500303	0.416997	0.969913	-0.290456	-0.503141	-0.622214	-0.403899	0.227386	-1.24063	-1.47266	0.226863	3.48827	-1.7511	-1.44622	-1.87326	-0.764814	-1.71714	-0.693905	-1.36279	0.348338	-0.748265	-0.285549	-2.70802	-0.434405	-1.4009	-1.93694	2.55577	-0.760387	-1.86803	3.64843	3.83094	-1.84307	0.842337	-0.0382131	-0.295488	#VALUE!	-0.914265	-1.27019
PK034-041	1.8106	EC	IIIC1	PGPN158-PK034-041_L1.bam.bin.cov.poly.corrected.bin.cov	0.737616	-1.6863	0.808932	-0.432146	0.162689	1.8106	0.409839	0.367071	-0.21553	-0.238942	-0.448415	1.46702	-0.163107	0.546263	1.01001	-0.319376	1.1275	-0.218493	0.366466	1.00998	0.685481	0.712347	1.1302	-0.657992	0.895534	0.146805	1.13011	0.601373	0.941202	1.32419	-0.23766	0.546096	0.868786	-1.15404	-0.0911041	-1.07664	0.71951	-0.39868	-0.727745	#VALUE!	0.651141	0.391856
PK034-048	1.96649	EC	Ia	PGPN158-PK034-048_L1.bam.bin.cov.poly.corrected.bin.cov	-0.101119	1.22205	0.371599	-0.7175	-0.594223	0.414436	0.534457	-0.175214	-0.538009	-1.96649	0.713201	-1.22379	0.19314	-1.36256	-0.0196312	0.724668	0.713472	0.410558	0.691502	-1.10019	-0.404904	-0.0977345	-0.0917198	0.786139	-0.0191712	-0.247414	0.0608802	0.260809	-0.137649	1.12915	1.74605	-0.412454	0.365398	-0.254898	0.927961	-0.547003	0.662481	-1.02154	1.24983	#VALUE!	-0.0731465	-0.437315
PK034-049	1.80684	EC	Ia	PGPN158-PK034-049_L1.bam.bin.cov.poly.corrected.bin.cov	0.506151	-1.80684	0.611748	-0.659688	-0.61355	0.0377558	0.989777	0.885176	0.368399	-0.694996	0.419073	-0.546142	0.597611	-0.569652	-0.0871959	-0.0431245	0.799222	1.04118	0.278687	0.0889467	1.38434	-0.320457	1.1669	1.27671	0.925951	0.615749	0.407083	0.918638	-0.297693	1.1949	0.776292	0.0768594	0.566634	-0.289165	-0.23086	-0.926434	0.296099	-0.283149	0.482019	#VALUE!	1.03032	0.43259
PK034-051	2.11395	EC	IB	PGPN163-PK034-051_L1.bam.bin.cov.poly.corrected.bin.cov	-0.0730718	0.239024	-0.342405	-1.50403	-0.0377635	-0.571614	0.333285	0.416584	0.18178	1.06605	0.503023	0.533757	1.06866	-0.0420948	0.733803	1.05698	0.401987	0.336482	0.885195	-0.643201	0.454335	-0.571463	-0.194543	-0.860429	0.582499	0.482823	0.0890439	0.204303	0.250794	1.26994	0.300708	-0.0109277	1.02441	-0.299452	0.851312	-0.273433	-0.968465	-0.121182	1.03576	#VALUE!	-0.0130261	-0.121821
PK034-055	3.64468	EC	Ia	PGPN163-PK034-055_L1.bam.bin.cov.poly.corrected.bin.cov	0.735511	-0.783651	0.835431	0.542959	0.49542	-1.08911	1.86672	0.326733	0.315045	0.233373	-0.539246	0.10048	-0.606181	0.898956	1.56771	1.82234	1.14243	-0.808089	0.588534	1.29481	-0.187141	0.605072	0.617915	-0.108779	0.654232	1.16848	0.270085	1.2477	0.961581	-0.325043	0.318573	0.734574	1.33052	-0.897942	-0.586178	0.0444095	-0.579372	0.238439	0.0943917	#VALUE!	0.20848	0.250976
PK034-059	2.47137	EC	Ia	PGPN175-PK034-059_L2.bam.bin.cov.poly.corrected.bin.cov	0.299981	1.7709	-0.208418	-0.144342	1.22768	1.08501	0.642579	-0.169087	-0.31912	-0.0397051	0.942276	-0.364325	0.244764	-0.101374	0.302712	-1.78679	0.44827	-0.0459243	-1.79579	0.226024	0.0693578	1.10211	0.590957	1.68226	-0.596111	1.22437	0.163455	0.236398	0.134528	1.86614	2.47137	0.00831847	-0.144538	3.73985	3.49995	-0.0169835	0.407598	-0.638169	-0.457468	#VALUE!	0.475153	0.0255621
PK034-067	5.97595	EC	Ia	PGPN175-PK034-067_L2.bam.bin.cov.poly.corrected.bin.cov	1.05758	-1.50372	1.65189	2.70265	0.55573	-0.0815413	0.925409	0.118496	0.656411	-0.0109361	-0.583704	1.52658	0.700296	3.23829	1.34431	2.98797	1.38889	-0.51126	1.5358	1.97283	0.81666	-0.409465	2.39064	1.85033	0.475399	0.00140014	0.239831	-0.199488	0.287263	0.0587061	-0.297013	1.25423	0.711962	-1.524	-1.0727	-0.00868631	-0.49778	0.223225	0.0107172	#VALUE!	0.126701	0.181333
PK034-072	4.99395	EC	Ia	PGPN176-PK034-072_L1.bam.bin.cov.poly.corrected.bin.cov	0.18837	0.769744	0.27042	2.01877	1.15019	0.120641	2.29665	1.35107	0.329647	0.597427	0.32401	0.944956	1.4468	0.634511	0.109996	2.49698	-0.056756	-0.545754	-0.57439	0.761842	-0.257908	0.262327	1.60158	-0.29068	0.534122	1.33403	-0.213145	-0.638081	-0.827701	0.0164501	-1.32183	-0.207948	0.485767	-0.791669	-0.773981	1.14543	0.868831	0.516983	-0.732158	#VALUE!	0.151418	0.44911
PK034-002	10.0372	EC	IB	PGPN85-PK034-002_L2.bam.bin.cov.poly.corrected.bin.cov	0.714159	-4.92866	-0.774167	-10.0372	-5.43215	-3.54213	-2.72426	-3.22375	-1.03923	-4.06814	-3.53586	-6.25228	-0.635073	-3.13865	-1.76532	-4.59748	-0.599348	1.68404	0.898279	4.3236	1.65063	2.45885	0.536304	-4.09084	-2.38398	2.874	1.88226	-3.0347	-1.94508	5.16085	4.97035	4.76317	0.425381	0.00106133	-0.375618	-1.94525	-1.5535	0.883802	-3.86246	#VALUE!	5.68481	1.35723
PK034-009	40.4241	EC	Ia	PGPN96-PK034-009_L2.bam.bin.cov.poly.corrected.bin.cov	-0.978233	-1.33967	3.74193	12.7014	-0.055104	1.33893	-0.409295	4.32835	-0.455977	-1.17082	-0.805781	-0.628241	-0.483016	-2.31678	4.55661	20.212	-1.27576	-1.67073	-1.91607	3.42667	-1.6346	-0.746103	-0.809999	-3.68865	1.72927	-0.858068	-0.366013	-0.332358	-1.698	-0.0301402	-1.39929	3.14634	1.12122	-2.81199	-2.12553	-1.55499	0.132372	-0.175989	-2.98278	#VALUE!	0.179802	-1.93902
PK034-034	19.3938	USC	II	PGPN135-PK034-034_L2.bam.bin.cov.poly.corrected.bin.cov	0.860638	-2.29744	1.99066	9.21635	0.733431	11.1737	0.985562	-2.66549	1.72917	-2.88141	0.216564	0.317576	-1.52437	-3.78614	-0.907519	9.69688	0.668407	-1.76516	4.08517	-0.417025	-2.64812	-1.14649	0.786016	-0.851983	1.56707	1.12062	-1.55423	-1.0818	-1.61128	-2.45657	-0.235392	-0.334693	-2.35681	0.336591	0.0777754	-1.52034	1.77351	0.412068	0.0278743	#VALUE!	0.173703	-0.958364
PK034-024	3.05442	USC	III	PGPN139-PK034-024_L1.bam.bin.cov.poly.corrected.bin.cov	0.529567	-0.017305	0.280411	2.4291	0.437041	1.67581	0.806154	0.63901	-0.507016	-0.0468116	0.201477	0.105147	1.04182	-0.318452	0.456815	1.52721	-0.219289	0.427681	-0.206376	1.19636	0.370671	1.70292	-0.759323	-0.228684	-0.517042	1.31758	0.892084	-0.47795	0.488607	-0.493277	-1.43418	1.16424	1.13344	-2.56339	-1.27679	0.484981	-1.25103	-0.966505	0.520516	#VALUE!	0.574171	-0.621095
PK034-050	43.4858	USC	Ib	PGPN163-PK034-050_L1.bam.bin.cov.poly.corrected.bin.cov	0.968038	2.38158	-0.229792	-0.918796	-2.59786	-2.09205	-0.878314	-2.17891	0.476588	0.332297	1.76354	0.744163	-1.57271	2.46814	-1.22206	21.7429	-1.64587	-1.82715	0.973545	0.625942	-0.516342	-0.815889	0.365168	-1.63573	-1.76058	0.601602	-1.28203	-1.27775	-0.862442	-1.05105	-0.325122	-0.562291	0.636828	2.5589	3.71711	1.07246	3.64041	-0.222104	2.6008	#VALUE!	-0.47519	-2.01485
PK034-010	4.54088	USC	Ia	PGPN98-PK034-010_L3.bam.bin.cov.poly.corrected.bin.cov	0.31524	-0.821639	0.241405	1.00668	1.34	-0.273374	0.748577	1.437	0.300978	-0.503718	0.152067	-0.190483	-0.639263	0.235069	0.405838	2.27044	1.20016	-0.130885	0.701173	1.79568	2.4429	1.00485	0.228821	-0.759347	0.814895	1.30283	0.767638	0.559882	1.11282	-0.836546	-2.50948	0.911299	2.33719	-2.37548	-1.18398	0.531588	-0.559533	-0.127049	-0.656506	#VALUE!	0.489533	0.514142
PG1249	4.21478	EC	Ia	PGPN81-PG1249_L3.bam.bin.cov.poly.corrected.bin.cov	1.14808	-1.13779	1.05405	0.132245	1.38374	-0.132845	1.46422	-0.0569231	0.576338	0.00212962	-0.539327	-0.126569	0.593411	0.181336	1.11766	2.10739	1.39807	1.11504	-1.1803	1.10519	0.871775	0.896524	-0.963428	-1.20391	1.83437	1.38909	0.604746	1.07702	1.43697	0.142637	-0.191564	1.50551	0.607973	-1.93672	-0.910775	0.838861	0.244918	-0.263473	-1.21402		1.65607	0.807998
PK034-058	2.20063	BE	0	PGPN163-PK034-058_L1.bam.bin.cov.poly.corrected.bin.cov	0.16711	0.151248	0.800888	0.934647	0.918976	-0.536816	0.641084	-0.0238235	0.73667	0.889163	-0.845744	-0.0484344	0.278314	0.210724	0.467334	2.59211	2.20063	0.0751038	0.232808	1.60954	0.0890777	0.729447	1.79585	0.281798	0.716133	0.856825	0.271315	1.3986	0.869903	0.199841	-0.459566	0.714967	1.21626	-1.19077	-1.65246	1.37701	0.224324	0.414641	-0.179652	#VALUE!	0.254986	0.490628
